# Supplementary material
Source: PubMed Central journal article supplement (PMC7440153)
Supplement: mmc1.pdf [file mmc1.pdf]

## Appendix A. Survey instrument

This survey was designed by Paul Reiter and colleagues at The Ohio State University. Data collection occurred in May 2020 via an online survey with a national sample of adults in the United States. Please cite the associated article when referencing this survey.

*[...] Brackets indicate text that participants did not see, including source of item, instructions to the programmer or response scale options not seen by participants.*

| <b>Eligibility Screener and Demographics</b> |                  |                                             |                                                                                                                                                                                                                                                                                                                                                                                                                                                                                                     |                                                                      |
|----------------------------------------------|------------------|---------------------------------------------|-----------------------------------------------------------------------------------------------------------------------------------------------------------------------------------------------------------------------------------------------------------------------------------------------------------------------------------------------------------------------------------------------------------------------------------------------------------------------------------------------------|----------------------------------------------------------------------|
| <b>Item #</b>                                | <b>Construct</b> | <b>Item</b>                                 | <b>Response Scale</b>                                                                                                                                                                                                                                                                                                                                                                                                                                                                               | <b>Notes</b>                                                         |
| A100                                         | Demographics     | What is your age?                           | _____ years old                                                                                                                                                                                                                                                                                                                                                                                                                                                                                     | <b>[Note to programmers: Make this Question Mandatory to Answer]</b> |
| A110                                         | Demographics     | Do you currently live in the United States? | 1 = Yes<br>2 = No                                                                                                                                                                                                                                                                                                                                                                                                                                                                                   | <b>[Note to programmers: Make this Question Mandatory to Answer]</b> |
| A120                                         | Demographics     | What state do you currently live in?        | 1 = Alabama<br>2 = Alaska<br>3 = Arizona<br>4 = Arkansas<br>5 = California<br>6 = Colorado<br>7 = Connecticut<br>8 = Delaware<br>9 = District of Columbia<br>10 = Florida<br>11 = Georgia<br>12 = Hawaii<br>13 = Idaho<br>14 = Illinois<br>15 = Indiana<br>16 = Iowa<br>17 = Kansas<br>18 = Kentucky<br>19 = Louisiana<br>20 = Maine<br>21 = Maryland<br>22 = Massachusetts<br>23 = Michigan<br>24 = Minnesota<br>25 = Mississippi<br>26 = Missouri<br>27 = Montana<br>28 = Nebraska<br>29 = Nevada | <b>[Note to programmers: Make this Question Mandatory to Answer]</b> |

- 30 = New Hampshire
- 31 = New Jersey
- 32 = New Mexico
- 33 = New York
- 34 = North Carolina
- 35 = North Dakota
- 36 = Ohio
- 37 = Oklahoma
- 38 = Oregon
- 39 = Pennsylvania
- 40 = Rhode Island
- 41 = South Carolina
- 42 = South Dakota
- 43 = Tennessee
- 44 = Texas
- 45 = Utah
- 46 = Vermont
- 47 = Virginia
- 48 = Washington
- 49 = West Virginia
- 50 = Wisconsin
- 51 = Wyoming
- X BLANK

|      |              |                                                                    |                                                                                                                                                                                                                                                                          |
|------|--------------|--------------------------------------------------------------------|--------------------------------------------------------------------------------------------------------------------------------------------------------------------------------------------------------------------------------------------------------------------------|
| A130 | Demographics | Are you of Hispanic, Latino, or Spanish origin?                    | 1 = Yes<br>2 = No<br>X BLANK                                                                                                                                                                                                                                             |
| A140 | Demographics | Which one of these groups would you say best represents your race? | 1 = White<br>2 = Black or African American<br>3 = American Indian or Alaskan Native<br>4 = Asian or Asian American<br>5 = Native Hawaiian or Other Pacific Islander<br>6 = Multiracial<br>7 = Other, please specify:<br>_____ <b>[open ended, Item #A150]</b><br>X BLANK |
| A150 | Demographics | Other race description                                             | open-ended                                                                                                                                                                                                                                                               |
| A160 | Demographics | How do you describe yourself?                                      | 1 = Male<br>2 = Female<br>3 = Transgender woman / Transfeminine<br>4 = Transgender man / Transmasculine<br>5 = Gender non-conforming / Nonbinary / Genderqueer<br>6 = Different identity<br>X BLANK                                                                      |

|                                  |                     |                                                                                                                                                                                                                                                                                                                   |                                                                                                                                                                                                                                                                                                                      |                                                                                      |
|----------------------------------|---------------------|-------------------------------------------------------------------------------------------------------------------------------------------------------------------------------------------------------------------------------------------------------------------------------------------------------------------|----------------------------------------------------------------------------------------------------------------------------------------------------------------------------------------------------------------------------------------------------------------------------------------------------------------------|--------------------------------------------------------------------------------------|
| A170                             | Demographics        | What is the highest level of education that you have completed?                                                                                                                                                                                                                                                   | 1 = Less than a high school degree<br>2 = High school degree or GED<br>3 = Some college or technical school<br>4 = College degree or more<br>X BLANK                                                                                                                                                                 |                                                                                      |
| <b>Awareness &amp; Knowledge</b> |                     |                                                                                                                                                                                                                                                                                                                   |                                                                                                                                                                                                                                                                                                                      |                                                                                      |
| <b>Item #</b>                    | <b>Construct</b>    | <b>Item</b>                                                                                                                                                                                                                                                                                                       | <b>Response Scale</b>                                                                                                                                                                                                                                                                                                | <b>Notes</b>                                                                         |
| B100                             | Perceived Knowledge | For the first few items, please tell us what you think about the new coronavirus called COVID-19. Sometimes COVID-19 may also be called "novel coronavirus," "SARS-CoV-2," or just "coronavirus." For the rest of this survey, we will call it "COVID-19."<br><br>How much would you say you know about COVID-19? | 1 = Nothing at all<br>2 = A little<br>3 = A moderate amount<br>4 = A lot<br>X BLANK                                                                                                                                                                                                                                  |                                                                                      |
| B110                             | Knowledge           | Do you think people over the age of 65 are at greater risk of severe illness if they get COVID-19?                                                                                                                                                                                                                | 1 = Yes<br>2 = No<br>8 = I don't know<br>X = BLANK                                                                                                                                                                                                                                                                   | <b>[Note to programmers: Randomize Items B110 – B150 and Put Into Question Grid]</b> |
| B120                             | Knowledge           | Do you think COVID-19 can be spread from person to person?                                                                                                                                                                                                                                                        | 1 = Yes<br>2 = No<br>8 = I don't know<br>X = BLANK                                                                                                                                                                                                                                                                   |                                                                                      |
| B130                             | Knowledge           | Do you think COVID-19 is caused by the same virus that causes influenza (flu)?                                                                                                                                                                                                                                    | 1 = Yes<br>2 = No<br>8 = I don't know<br>X = BLANK                                                                                                                                                                                                                                                                   |                                                                                      |
| B140                             | Knowledge           | Do you think people with COVID-19 always show symptoms of being sick?                                                                                                                                                                                                                                             | 1 = Yes<br>2 = No<br>8 = I don't know<br>X = BLANK                                                                                                                                                                                                                                                                   |                                                                                      |
| B150                             | Knowledge           | Do you think most people who get COVID-19 only have mild symptoms?                                                                                                                                                                                                                                                | 1 = Yes<br>2 = No<br>8 = I don't know<br>X = BLANK                                                                                                                                                                                                                                                                   |                                                                                      |
| B160                             | Knowledge           | Which of the following do you think can be symptoms of COVID-19? Please select all that apply.                                                                                                                                                                                                                    | 1 = Fever<br>2 = Cough<br>3 = Shortness of breath<br>4 = Sore throat<br>5 = Runny or stuffy nose<br>6 = Muscle or body aches<br>7 = Headaches<br>8 = Fatigue (feeling tired)<br>9 = Diarrhea<br>10 = Loss of smell or taste<br>11 = Rash on face<br>12 = Blurry vision<br>13 = Ear ache<br>14 = Hair loss<br>X BLANK | <b>[Note to programmers: Randomize response options 1 through 14]</b>                |

| B170                                 | Knowledge        | Which of the following statements about COVID-19 do you think is correct?                                                                                                                                                                                                                                                                                                                                                                                                     | 1 = After a person has recovered from COVID-19, he/she <u>cannot</u> get it again<br>2 = After a person has recovered from COVID-19, he/she <u>can</u> get it again<br>8 = I don't know<br>X BLANK                                                                      |                                                                                                                                       |
|--------------------------------------|------------------|-------------------------------------------------------------------------------------------------------------------------------------------------------------------------------------------------------------------------------------------------------------------------------------------------------------------------------------------------------------------------------------------------------------------------------------------------------------------------------|-------------------------------------------------------------------------------------------------------------------------------------------------------------------------------------------------------------------------------------------------------------------------|---------------------------------------------------------------------------------------------------------------------------------------|
|                                      | Knowledge        | <p>COVID-19 is a new respiratory disease caused by a virus. The virus is different from influenza. COVID-19 is being called a pandemic, meaning there are lots of cases around the world. This includes over a million cases in the U.S.</p> <p>COVID-19 can be spread from person to person. There are many possible symptoms, but a few of the more common ones are fever, fatigue, and cough. Most people recover from COVID-19 without needing any special treatment.</p> |                                                                                                                                                                                                                                                                         | <b>[Note to programmers: Once this screen appears, do NOT allow participants to go backwards in the survey to any previous items]</b> |
| <b>Communication and Information</b> |                  |                                                                                                                                                                                                                                                                                                                                                                                                                                                                               |                                                                                                                                                                                                                                                                         |                                                                                                                                       |
| <u>Item #</u>                        | <u>Construct</u> | <u>Item</u>                                                                                                                                                                                                                                                                                                                                                                                                                                                                   | <u>Response Scale</u>                                                                                                                                                                                                                                                   | <u>Notes</u>                                                                                                                          |
| C100                                 | Communication    | <p>The next few questions are about news and information about COVID-19 that you may have seen or heard.</p> <p>How much news and information have you seen or heard about COVID-19?</p>                                                                                                                                                                                                                                                                                      | <p>1 = None at all<br/>2 = A little<br/>3 = A moderate amount<br/>4 = A lot<br/>X BLANK</p> <p><b>[IF C100=2,3,4 CONTINUE TO C110]<br/>[IF C100=1,X SKIP TO C120]</b></p>                                                                                               |                                                                                                                                       |
| C110                                 | Communication    | Where have you seen or heard news and information about COVID-19? Please select all that apply.                                                                                                                                                                                                                                                                                                                                                                               | <p><b>[IF C100=2,3,4]</b></p> <p>1 = Newspaper<br/>2 = Magazine<br/>3 = Radio<br/>4 = Local news on TV<br/>5 = National news on TV (like CNN or Fox News)<br/>6 = Social media (e.g. Facebook, Twitter, YouTube)<br/>7 = Internet, but not social media<br/>X BLANK</p> | <b>[Note to programmers: Randomize response options 1 through 7, with 7 always following 6]</b>                                       |

|      |                |                                                                                                     |                                                                                                                                                                                                                                                                                                                                                                                                       |                                                                                                            |
|------|----------------|-----------------------------------------------------------------------------------------------------|-------------------------------------------------------------------------------------------------------------------------------------------------------------------------------------------------------------------------------------------------------------------------------------------------------------------------------------------------------------------------------------------------------|------------------------------------------------------------------------------------------------------------|
| C120 | Communication  | Which one of these sources would you <u>trust the most</u> for news and information about COVID-19? | 1 = Newspaper<br>2 = Magazine<br>3 = Radio<br>4 = Local news on TV<br>5 = National news on TV (like CNN or Fox News)<br>6 = Social media (e.g. Facebook, Twitter, YouTube)<br>7 = Internet, but not social media<br>X BLANK                                                                                                                                                                           | <b>[Note to programmers: Randomize response options 1 through 7, with 7 always following 6]</b>            |
| C130 | Communication  | Who have you talked to about COVID-19?<br>Please select all that apply.                             | 1 = My spouse, partner, or significant other<br>2 = My children<br>3 = My parents<br>4 = Other family member(s)<br>5 = Friend(s)<br>6 = Boss or co-workers<br>7 = Doctor or other health care provider<br>8 = Someone else, please tell us: _____ <b>[open ended, Item #C140]</b><br>9 = I have not talked to anyone<br>X BLANK<br><br><b>[IF C130=9 SKIP TO C170; ELSE CONTINUE TO C150]</b>         | <b>[Note to programmers: If response option #9 is selected, do not allow other answers to be selected]</b> |
| C140 | Communication  | Other person description                                                                            | open-ended                                                                                                                                                                                                                                                                                                                                                                                            |                                                                                                            |
| C150 | Communication  | What came up during these conversations about COVID-19? Please select all that apply.               | 1 = Its symptoms<br>2 = How to get tested<br>3 = Treatment options<br>4 = How to prevent getting it<br>5 = How to take care of someone who has it<br>6 = Travel restrictions<br>7 = Work restrictions<br>8 = School restrictions<br>9 = How the government is handling it<br>10 = Its effects on the economy<br>11 = Something else, please tell us: _____ <b>[open ended, Item #C160]</b><br>X BLANK | <b>[Note to programmers: Randomize response options 1 through 10]</b>                                      |
| C160 | Communication  | Other topic description                                                                             | open-ended                                                                                                                                                                                                                                                                                                                                                                                            |                                                                                                            |
| C170 | Misinformation | Which of the following best describes the information you have seen or heard about COVID-19?        | 1 = I have mostly seen the same information across different sources<br>2 = I have mostly seen conflicting information across different sources<br>X BLANK                                                                                                                                                                                                                                            | <b>[Note to programmers: Rotate response options 1 and 2]</b>                                              |

|                               |                  |                                                                                                                                                                                                 |                                                                                                                                                                                                                                                                                                                    |                                                                                              |
|-------------------------------|------------------|-------------------------------------------------------------------------------------------------------------------------------------------------------------------------------------------------|--------------------------------------------------------------------------------------------------------------------------------------------------------------------------------------------------------------------------------------------------------------------------------------------------------------------|----------------------------------------------------------------------------------------------|
| C180                          | Misinformation   | How much information have you seen or heard about COVID-19 that seemed fake or made up?                                                                                                         | 1 = None at all<br>2 = A little<br>3 = A moderate amount<br>4 = A lot<br>X BLANK                                                                                                                                                                                                                                   |                                                                                              |
| C190                          | Misinformation   | What information about COVID-19 seemed the most fake or made up? Please be as specific as possible.                                                                                             | open-ended                                                                                                                                                                                                                                                                                                         |                                                                                              |
| C200                          | Misinformation   | Recently, there was a news story that the President may have wondered if COVID-19 could be treated by injecting a disinfectant (like bleach).<br><br>Did you see or hear about this news story? | 1 = Yes<br>2 = No<br>X = BLANK<br><br>[IF C200=1 CONTINUE TO C210]<br>[IF C200=2,X SKIP TO C220]                                                                                                                                                                                                                   |                                                                                              |
| C210                          | Misinformation   | What did you think about that news story?                                                                                                                                                       | [IF C200=1]<br><br>1 = The story was real and the President was being serious when he said that<br>2 = The story was real but the President was joking when he said that<br>3 = The story was fake (created by the media) and the President didn't say that at all<br>4 = I wasn't sure what to think<br>X = BLANK | [Note to programmers: Rotate response options 1-3 half of the time and 3-1 half of the time] |
| C220                          | Misinformation   | From the information you have seen or heard, do you think it is most likely that COVID-19...                                                                                                    | 1 = Came from animals and was passed to humans<br>2 = Was made on purpose in a science lab<br>3 = Was made by accident in a science lab<br>4 = Does not really exist<br>X BLANK                                                                                                                                    | [Note to programmers: Randomize response options 1 through 4]                                |
| <b>Health and Life Impact</b> |                  |                                                                                                                                                                                                 |                                                                                                                                                                                                                                                                                                                    |                                                                                              |
| <u>Item #</u>                 | <u>Construct</u> | <u>Item</u>                                                                                                                                                                                     | <u>Response Scale</u>                                                                                                                                                                                                                                                                                              | <u>Notes</u>                                                                                 |
| D100                          | Testing          | The next questions are about the impact that COVID-19 has had on people's health and lives.<br><br>Have you ever been tested to see if you have COVID-19?                                       | 1 = Yes<br>2 = No<br>X = BLANK<br><br>[IF D100=1 CONTINUE TO D110]<br>[IF D100=2,X SKIP TO D130]                                                                                                                                                                                                                   |                                                                                              |

|      |                 |                                                                                                                               |                                                                                                                                                                                                                                                                                                                                                                             |                                                                      |
|------|-----------------|-------------------------------------------------------------------------------------------------------------------------------|-----------------------------------------------------------------------------------------------------------------------------------------------------------------------------------------------------------------------------------------------------------------------------------------------------------------------------------------------------------------------------|----------------------------------------------------------------------|
| D110 | Testing         | Where did you go to get tested for COVID-19?                                                                                  | <p><b>[IF D100=1]</b></p> <p>1 = Doctor's office, health clinic, or hospital<br/> 2 = A drive-thru testing site<br/> 3 = A test was mailed to my home<br/> 4 = Other, please tell us: _____ <b>[open ended, Item #D120]</b><br/> X BLANK</p>                                                                                                                                |                                                                      |
| D120 | Testing         | Other testing location description                                                                                            | open-ended                                                                                                                                                                                                                                                                                                                                                                  |                                                                      |
| D130 | Disease history | Have you ever been told by a doctor or other health care provider that you have COVID-19?                                     | <p>1 = Yes<br/> 2 = No<br/> X = BLANK</p> <p><b>[IF D130=2,X CONTINUE TO D140]</b><br/> <b>[IF D130=1 SKIP TO D150]</b></p>                                                                                                                                                                                                                                                 |                                                                      |
| D140 | Disease history | Have you ever thought that you had COVID-19 because of symptoms but were never tested or diagnosed by a health care provider? | <p><b>[IF D130=2,X]</b></p> <p>1 = Yes<br/> 2 = No<br/> X = BLANK</p>                                                                                                                                                                                                                                                                                                       |                                                                      |
| D150 | Disease history | Has a friend or family member ever been told by a doctor or other health care provider that they have COVID-19?               | <p>1 = Yes<br/> 2 = No<br/> X = BLANK</p>                                                                                                                                                                                                                                                                                                                                   |                                                                      |
| D160 | Testing         | Have you ever tried to get tested for COVID-19 but was unsuccessful?                                                          | <p>1 = Yes<br/> 2 = No<br/> X = BLANK</p> <p><b>[IF D160=1 CONTINUE TO D170]</b><br/> <b>[IF D160=2,X SKIP TO D190]</b></p>                                                                                                                                                                                                                                                 |                                                                      |
| D170 | Testing         | What is the main reason that you were unsuccessful in getting tested for COVID-19?                                            | <p><b>[IF D160=1]</b></p> <p>1 = Could not find a place to get tested<br/> 2 = Doctor or other health care provider said that I did not need to get tested<br/> 3 = Trouble collecting the sample from my nose or throat<br/> 4 = The test costs too much<br/> 5 = No transportation<br/> 6 = Other, please tell us: _____ <b>[open ended, Item #D180]</b><br/> X BLANK</p> | <b>[Note to programmers: Randomize response options 1 through 5]</b> |
| D180 | Testing         | Other reason description                                                                                                      | open-ended                                                                                                                                                                                                                                                                                                                                                                  |                                                                      |

|      |                 |                                                                                                                                                                                                                                                                                                                                                                                                                                                                                                                                                                                                                                                                                                                                                                                                                                                                  |                                                                                                                                                      |                                                                                                            |
|------|-----------------|------------------------------------------------------------------------------------------------------------------------------------------------------------------------------------------------------------------------------------------------------------------------------------------------------------------------------------------------------------------------------------------------------------------------------------------------------------------------------------------------------------------------------------------------------------------------------------------------------------------------------------------------------------------------------------------------------------------------------------------------------------------------------------------------------------------------------------------------------------------|------------------------------------------------------------------------------------------------------------------------------------------------------|------------------------------------------------------------------------------------------------------------|
| D190 | At-home testing | <p>Scientists are currently working on different types of tests for COVID-19 that people could use at home.</p> <p>The first type of test would be for people who currently have symptoms to see if they have COVID-19. Testing positive means that a person currently has COVID-19.</p> <p>For this test, a health clinic would mail someone a test to do at home. The person would collect either a saliva (spit) sample or use a long Q-tip to get a sample from the back of their nose or throat. The person would then mail the sample to a health clinic for testing.</p> <p>Imagine this test becomes available and you were having symptoms. How willing would you be to use this home test to see if you were currently sick with COVID-19?</p>                                                                                                         | <p>5 = Definitely willing<br/> 4 = Probably willing<br/> 3 = Not sure<br/> 2 = Probably not willing<br/> 1 = Definitely not willing<br/> X BLANK</p> | <p><b>[Note to programmers: Rotate response options 1-5 half of the time and 5-1 half of the time]</b></p> |
| D200 | At-home testing | <p>The second type of test would tell people if they have ever had COVID-19, even if they never had any symptoms. Testing positive means that a person had COVID-19 at some point in the past and their body may now have protection against getting it again in the future. People could do this test whether or not they currently have any symptoms.</p> <p>For this test, a health clinic would mail someone a test to do at home. The person would prick their finger and place a drop of blood onto the test. The person then takes a picture of the test and sends it to a health clinic through an app on their phone/computer. The clinic then looks at the picture and calls the person to tell them the results.</p> <p>Imagine this test becomes available. How willing would you be to use this home test to see if you have ever had COVID-19?</p> | <p>5 = Definitely willing<br/> 4 = Probably willing<br/> 3 = Not sure<br/> 2 = Probably not willing<br/> 1 = Definitely not willing<br/> X BLANK</p> | <p><b>[Note to programmers: Rotate response options 1-5 half of the time and 5-1 half of the time]</b></p> |



|      |                      |                                                                                                                                                                                    |                                                                                                                                                                                                                                                                                                                                                                                                                                                                                                           |                                                                                                                                                                                                 |
|------|----------------------|------------------------------------------------------------------------------------------------------------------------------------------------------------------------------------|-----------------------------------------------------------------------------------------------------------------------------------------------------------------------------------------------------------------------------------------------------------------------------------------------------------------------------------------------------------------------------------------------------------------------------------------------------------------------------------------------------------|-------------------------------------------------------------------------------------------------------------------------------------------------------------------------------------------------|
| D210 | Impact on daily life | <p>COVID-19 has impacted people's day-to-day life in many different ways.</p> <p>Have you experienced any of these difficulties due to COVID-19? Please select all that apply.</p> | <p>1 = Reduced wages or work hours<br/> 2 = Job loss<br/> 3 = Loss of savings or retirement funds<br/> 4 = Problems with housing<br/> 5 = Childcare issues<br/> 6 = Problems getting food<br/> 7 = Problems getting cleaning supplies or other household items<br/> 8 = Problems getting medications<br/> 9 = Transportation issues<br/> 10 = Problems accessing health care<br/> 11 = Something else, please tell us: _____ <b>[open ended, Item #D220]</b><br/> 12 = None of the above<br/> X BLANK</p> | <p><b>[Note to programmers: Randomize response options 1 through 10]</b></p> <p><b>[Note to programmers: If response option #12 is selected, do not allow other answers to be selected]</b></p> |
| D220 | Impact on daily life | Other way description                                                                                                                                                              | open-ended                                                                                                                                                                                                                                                                                                                                                                                                                                                                                                |                                                                                                                                                                                                 |
| D230 | Impact on daily life | <p>How much of a threat is COVID-19 to...</p> <p>...your physical health?</p>                                                                                                      | <p>1 = Not a threat<br/> 2 = Minor threat<br/> 3 = Moderate threat<br/> 4 = Major threat<br/> X BLANK</p>                                                                                                                                                                                                                                                                                                                                                                                                 | <b>[Note to programmers: Randomize Items D230 – D280 and Put Into Question Grid]</b>                                                                                                            |
| D240 | Impact on daily life | ...your mental health?                                                                                                                                                             | <p>1 = Not a threat<br/> 2 = Minor threat<br/> 3 = Moderate threat<br/> 4 = Major threat<br/> X BLANK</p>                                                                                                                                                                                                                                                                                                                                                                                                 |                                                                                                                                                                                                 |
| D250 | Impact on daily life | ...the health of the U.S. population as a whole?                                                                                                                                   | <p>1 = Not a threat<br/> 2 = Minor threat<br/> 3 = Moderate threat<br/> 4 = Major threat<br/> X BLANK</p>                                                                                                                                                                                                                                                                                                                                                                                                 |                                                                                                                                                                                                 |
| D260 | Impact on daily life | ...your personal financial safety?                                                                                                                                                 | <p>1 = Not a threat<br/> 2 = Minor threat<br/> 3 = Moderate threat<br/> 4 = Major threat<br/> X BLANK</p>                                                                                                                                                                                                                                                                                                                                                                                                 |                                                                                                                                                                                                 |
| D270 | Impact on daily life | ...the economy of the United States?                                                                                                                                               | <p>1 = Not a threat<br/> 2 = Minor threat<br/> 3 = Moderate threat<br/> 4 = Major threat<br/> X BLANK</p>                                                                                                                                                                                                                                                                                                                                                                                                 |                                                                                                                                                                                                 |
| D280 | Impact on daily life | ...day-to-day life in your local community?                                                                                                                                        | <p>1 = Not a threat<br/> 2 = Minor threat<br/> 3 = Moderate threat<br/> 4 = Major threat<br/> X BLANK</p>                                                                                                                                                                                                                                                                                                                                                                                                 |                                                                                                                                                                                                 |

|                                |                      |                                                                                                                                                                                                          |                                                                                                                                                                                                                                                                                                                                                                                                                                                                                                                                                                                                                                                                                                                                                        |                                                                                                                                                                                                 |
|--------------------------------|----------------------|----------------------------------------------------------------------------------------------------------------------------------------------------------------------------------------------------------|--------------------------------------------------------------------------------------------------------------------------------------------------------------------------------------------------------------------------------------------------------------------------------------------------------------------------------------------------------------------------------------------------------------------------------------------------------------------------------------------------------------------------------------------------------------------------------------------------------------------------------------------------------------------------------------------------------------------------------------------------------|-------------------------------------------------------------------------------------------------------------------------------------------------------------------------------------------------|
| D290                           | Impact on daily life | <p>People have made many types of changes to their lifestyle or daily activities because of COVID-19.</p> <p>Which of these changes have you made because of COVID-19? Please select all that apply.</p> | <p>1 = Bought extra medicine or medical supplies (e.g., thermometer)<br/> 2 = Bought food supplies on a larger scale<br/> 3 = Bought cleaning supplies on a larger scale<br/> 4 = Bought other household supplies (e.g., toilet paper) on a larger scale<br/> 5 = Had groceries or other supplies mailed to my home<br/> 6 = Avoided or cancelled domestic travel<br/> 7 = Avoided or cancelled international travel<br/> 8 = Avoided visiting family members or friends even when I did not have symptoms of disease<br/> 9 = Avoided going to the doctor or dentist for routine appointments<br/> 10 = Worked from home<br/> 11 = Something else, please tell us: _____ <b>[open ended, Item #D295]</b><br/> 12 = None of the above<br/> X BLANK</p> | <p><b>[Note to programmers: Rotate response options 1 through 10]</b></p> <p><b>[Note to programmers: If response option #12 is selected, do not allow other answers to be selected]</b></p>    |
| D295                           | Impact on daily life | Other change description                                                                                                                                                                                 | open-ended                                                                                                                                                                                                                                                                                                                                                                                                                                                                                                                                                                                                                                                                                                                                             |                                                                                                                                                                                                 |
| D300                           | Impact on daily life | <p>COVID-19 has also affected how people feel and act.</p> <p>Which of the following have you experienced due to COVID-19? Please select all that apply.</p>                                             | <p>1 = Fear of getting sick<br/> 2 = Worry about friends and family<br/> 3 = Boredom<br/> 4 = Frustration<br/> 5 = Anxiety<br/> 6 = Depression<br/> 7 = Trouble sleeping<br/> 8 = Increased alcohol or other substance use<br/> 9 = Increased sexual activity<br/> 10 = Decreased sexual activity<br/> 11 = Loneliness<br/> 12 = Confusion<br/> 13 = None of the above<br/> X BLANK</p>                                                                                                                                                                                                                                                                                                                                                                | <p><b>[Note to programmers: Randomize response options 1 through 12]</b></p> <p><b>[Note to programmers: If response option #13 is selected, do not allow other answers to be selected]</b></p> |
| D310                           | Impact on daily life | On a scale of 0 to 100, how much would you say COVID-19 has impacted your life overall?                                                                                                                  | <p>0 = Smallest amount possible<br/> 100 = Largest amount possible<br/> X BLANK</p>                                                                                                                                                                                                                                                                                                                                                                                                                                                                                                                                                                                                                                                                    |                                                                                                                                                                                                 |
| D320                           | Impact on daily life | What is the <u>biggest way</u> that COVID-19 has impacted your life? Please tell us.                                                                                                                     | open ended                                                                                                                                                                                                                                                                                                                                                                                                                                                                                                                                                                                                                                                                                                                                             |                                                                                                                                                                                                 |
| <b>Attitudes &amp; Beliefs</b> |                      |                                                                                                                                                                                                          |                                                                                                                                                                                                                                                                                                                                                                                                                                                                                                                                                                                                                                                                                                                                                        |                                                                                                                                                                                                 |
| <u>Item #</u>                  | <u>Construct</u>     | <u>Item</u>                                                                                                                                                                                              | <u>Response Scale</u>                                                                                                                                                                                                                                                                                                                                                                                                                                                                                                                                                                                                                                                                                                                                  | <u>Notes</u>                                                                                                                                                                                    |

|      |                      |                                                                                                                                                                                                      |                                                                                                                                 |                                                                                                                                                                                                 |
|------|----------------------|------------------------------------------------------------------------------------------------------------------------------------------------------------------------------------------------------|---------------------------------------------------------------------------------------------------------------------------------|-------------------------------------------------------------------------------------------------------------------------------------------------------------------------------------------------|
| E100 | Perceived likelihood | The next few questions ask for your opinions about COVID-19. Please answer each question.<br><br>What do you think is the chance that you will get COVID-19 in the future?                           | 1 = No chance<br>2 = Low chance<br>3 = Moderate chance<br>4 = High chance<br>X BLANK                                            |                                                                                                                                                                                                 |
| E110 | Perceived severity   | How serious do you think it would be if you got COVID-19?                                                                                                                                            | 1 = Not at all<br>2 = A little<br>3 = Moderately<br>4 = Very<br>X BLANK                                                         |                                                                                                                                                                                                 |
| E120 | Stigma               | For the next few items, please imagine you were told that you had COVID-19. Say how much you agree or disagree with each item.<br><br>If I had COVID-19...<br><br>...people would think badly of me. | <b>[IF D130=2,X]</b><br><br>5 = Strongly agree<br>4 = Agree<br>3 = Not sure<br>2 = Disagree<br>1 = Strongly disagree<br>X BLANK | <b>[Note to programmers: Randomize Items E120 – E150 and Put Into Question Grid]</b><br><br><b>[Note to programmers: Rotate response options 1-5 half of the time and 5-1 half of the time]</b> |
| E130 | Stigma               | ...I would be embarrassed.                                                                                                                                                                           | <b>[IF D130=2,X]</b><br><br>5 = Strongly agree<br>4 = Agree<br>3 = Not sure<br>2 = Disagree<br>1 = Strongly disagree<br>X BLANK |                                                                                                                                                                                                 |
| E140 | Stigma               | ...people would treat me differently.                                                                                                                                                                | <b>[IF D130=2,X]</b><br><br>5 = Strongly agree<br>4 = Agree<br>3 = Not sure<br>2 = Disagree<br>1 = Strongly disagree<br>X BLANK |                                                                                                                                                                                                 |
| E150 | Stigma               | ...I would not tell anyone.                                                                                                                                                                          | <b>[IF D130=2,X]</b><br><br>5 = Strongly agree<br>4 = Agree<br>3 = Not sure<br>2 = Disagree<br>1 = Strongly disagree<br>X BLANK |                                                                                                                                                                                                 |
| E160 | Stigma               | For the next few items, please think about when you had COVID-19. Say how much you agree or disagree with each item.<br><br>When I had COVID-19...<br><br>...people thought badly of me.             | <b>[IF D130=1]</b><br><br>5 = Strongly agree<br>4 = Agree<br>3 = Not sure<br>2 = Disagree<br>1 = Strongly disagree<br>X BLANK   | <b>[Note to programmers: Randomize Items E160 – E190 and Put Into Question Grid]</b><br><br><b>[Note to programmers: Rotate response options 1-5 half of</b>                                    |

|      |        |                                   |                                                                                                                               |
|------|--------|-----------------------------------|-------------------------------------------------------------------------------------------------------------------------------|
| E170 | Stigma | ...I was embarrassed.             | <b>[IF D130=1]</b><br><br>5 = Strongly agree<br>4 = Agree<br>3 = Not sure<br>2 = Disagree<br>1 = Strongly disagree<br>X BLANK |
| E180 | Stigma | ...people treated me differently. | <b>[IF D130=1]</b><br><br>5 = Strongly agree<br>4 = Agree<br>3 = Not sure<br>2 = Disagree<br>1 = Strongly disagree<br>X BLANK |
| E190 | Stigma | ...I did not tell anyone.         | <b>[IF D130=1]</b><br><br>5 = Strongly agree<br>4 = Agree<br>3 = Not sure<br>2 = Disagree<br>1 = Strongly disagree<br>X BLANK |

**Protective Behaviors**

| <b>Item #</b> | <b>Construct</b>     | <b>Item</b>                                                                                                                                                                                                                                                                                                                                                                                            | <b>Response Scale</b>                                                       | <b>Notes</b>                                                         |
|---------------|----------------------|--------------------------------------------------------------------------------------------------------------------------------------------------------------------------------------------------------------------------------------------------------------------------------------------------------------------------------------------------------------------------------------------------------|-----------------------------------------------------------------------------|----------------------------------------------------------------------|
| F100          | Protective behaviors | The next few questions are about things people can do to help reduce the spread of COVID-19.<br><br>Please tell us how often you performed each of the behaviors <u>during the first few months of the COVID-19 pandemic (March-April 2020)</u> .<br><br>Washing your hands often for at least 20 seconds, especially after being in a public place or after blowing your nose, coughing, or sneezing. | 1 = Not at all<br>2 = Some days<br>3 = Most days<br>4 = Everyday<br>X BLANK | <b>[Note to programmers: Put Items F100-F140 Into Question Grid]</b> |
| F110          | Protective behaviors | Using hand sanitizer that contains at least 60% alcohol.                                                                                                                                                                                                                                                                                                                                               | 1 = Not at all<br>2 = Some days<br>3 = Most days<br>4 = Everyday<br>X BLANK |                                                                      |
| F120          | Protective behaviors | Wearing a mask or cloth face cover when going out in public.                                                                                                                                                                                                                                                                                                                                           | 1 = Not at all<br>2 = Some days<br>3 = Most days<br>4 = Everyday<br>X BLANK |                                                                      |

|      |                      |                                                                                                                                                                                                                                                                                                                                          |                                                                                                     |                                                                                                                                                                                                 |
|------|----------------------|------------------------------------------------------------------------------------------------------------------------------------------------------------------------------------------------------------------------------------------------------------------------------------------------------------------------------------------|-----------------------------------------------------------------------------------------------------|-------------------------------------------------------------------------------------------------------------------------------------------------------------------------------------------------|
| F130 | Protective behaviors | Social distancing (keeping about 6 feet between yourself and other people).                                                                                                                                                                                                                                                              | 1 = Not at all<br>2 = Some days<br>3 = Most days<br>4 = Everyday<br>X BLANK                         |                                                                                                                                                                                                 |
| F140 | Protective behaviors | Self-quarantine (staying away from situations where you may be in close contact with others, such as social gatherings, work, and school).                                                                                                                                                                                               | 1 = Not at all<br>2 = Some days<br>3 = Most days<br>4 = Everyday<br>X BLANK                         |                                                                                                                                                                                                 |
| F150 | Protective behaviors | Please tell us how often you performed each of the behaviors <u>during the last week</u> .<br><br>Washing your hands often for at least 20 seconds, especially after being in a public place or after blowing your nose, coughing, or sneezing.                                                                                          | 1 = Not at all<br>2 = Some days<br>3 = Most days<br>4 = Everyday<br>X BLANK                         | <b>[Note to programmers: Put Items F150-F190 Into Question Grid]</b>                                                                                                                            |
| F160 | Protective behaviors | Using hand sanitizer that contains at least 60% alcohol.                                                                                                                                                                                                                                                                                 | 1 = Not at all<br>2 = Some days<br>3 = Most days<br>4 = Everyday<br>X BLANK                         |                                                                                                                                                                                                 |
| F170 | Protective behaviors | Wearing a mask or cloth face cover when going out in public.                                                                                                                                                                                                                                                                             | 1 = Not at all<br>2 = Some days<br>3 = Most days<br>4 = Everyday<br>X BLANK                         |                                                                                                                                                                                                 |
| F180 | Protective behaviors | Social distancing (keeping about 6 feet between yourself and other people).                                                                                                                                                                                                                                                              | 1 = Not at all<br>2 = Some days<br>3 = Most days<br>4 = Everyday<br>X BLANK                         |                                                                                                                                                                                                 |
| F190 | Protective behaviors | Self-quarantine (staying away from situations where you may be in close contact with others, such as social gatherings, work, and school).                                                                                                                                                                                               | 1 = Not at all<br>2 = Some days<br>3 = Most days<br>4 = Everyday<br>X BLANK                         |                                                                                                                                                                                                 |
| F200 | Response efficacy    | For the next few items, "protective behaviors" refer to those things people can do to help reduce the spread of COVID-19. This includes hand washing, social distancing, and self-quarantine. Please tell us how much you agree or disagree with each item.<br><br>Protective behaviors are a good way to reduce the spread of COVID-19. | 5 = Strongly agree<br>4 = Agree<br>3 = Not sure<br>2 = Disagree<br>1 = Strongly disagree<br>X BLANK | <b>[Note to programmers: Randomize Items F200 – F250 and Put Into Question Grid]</b><br><br><b>[Note to programmers: Rotate response options 1-5 half of the time and 5-1 half of the time]</b> |

|      |                    |                                                                                                                                                                                                                                                                                                                                              |                                                                                                     |                                                                                                                                                                                                 |
|------|--------------------|----------------------------------------------------------------------------------------------------------------------------------------------------------------------------------------------------------------------------------------------------------------------------------------------------------------------------------------------|-----------------------------------------------------------------------------------------------------|-------------------------------------------------------------------------------------------------------------------------------------------------------------------------------------------------|
| F210 | Self-efficacy      | I am confident I can correctly do protective behaviors.                                                                                                                                                                                                                                                                                      | 5 = Strongly agree<br>4 = Agree<br>3 = Not sure<br>2 = Disagree<br>1 = Strongly disagree<br>X BLANK |                                                                                                                                                                                                 |
| F220 | Social norms       | Many people in my community are doing protective behaviors.                                                                                                                                                                                                                                                                                  | 5 = Strongly agree<br>4 = Agree<br>3 = Not sure<br>2 = Disagree<br>1 = Strongly disagree<br>X BLANK |                                                                                                                                                                                                 |
| F230 | Attitude           | We need to prioritize going back to our normal routines as soon as possible instead of worrying about protective behaviors.                                                                                                                                                                                                                  | 5 = Strongly agree<br>4 = Agree<br>3 = Not sure<br>2 = Disagree<br>1 = Strongly disagree<br>X BLANK |                                                                                                                                                                                                 |
| F240 | Attitude           | It should be a crime if people know they have COVID-19 and not do protective behaviors.                                                                                                                                                                                                                                                      | 5 = Strongly agree<br>4 = Agree<br>3 = Not sure<br>2 = Disagree<br>1 = Strongly disagree<br>X BLANK |                                                                                                                                                                                                 |
| F250 | Attitude           | People who test positive for COVID-19 should be quarantined or isolated from others.                                                                                                                                                                                                                                                         | 5 = Strongly agree<br>4 = Agree<br>3 = Not sure<br>2 = Disagree<br>1 = Strongly disagree<br>X BLANK |                                                                                                                                                                                                 |
| F260 | Government actions | Many state governments have taken actions to help reduce the spread of COVID-19. This include stay-at-home orders, shelter-in-place orders, and closing schools. We are interested in your opinions about the government actions in your state.<br><br>I think the actions of my state government have helped reduce the spread of COVID-19. | 5 = Strongly agree<br>4 = Agree<br>3 = Not sure<br>2 = Disagree<br>1 = Strongly disagree<br>X BLANK | <b>[Note to programmers: Randomize Items F260 – F290 and Put Into Question Grid]</b><br><br><b>[Note to programmers: Rotate response options 1-5 half of the time and 5-1 half of the time]</b> |
| F270 | Government actions | The government in my state should be able to restrict personal rights to help reduce the spread of COVID-19.                                                                                                                                                                                                                                 | 5 = Strongly agree<br>4 = Agree<br>3 = Not sure<br>2 = Disagree<br>1 = Strongly disagree<br>X BLANK |                                                                                                                                                                                                 |
| F280 | Government actions | I trust my state government to make good decisions about reducing the spread of COVID-19.                                                                                                                                                                                                                                                    | 5 = Strongly agree<br>4 = Agree<br>3 = Not sure<br>2 = Disagree<br>1 = Strongly disagree<br>X BLANK |                                                                                                                                                                                                 |

|                    |                       |                                                                                                                                                                                                                                                                                                                                                                                                           |                                                                                                                                        |                                                                                                                           |
|--------------------|-----------------------|-----------------------------------------------------------------------------------------------------------------------------------------------------------------------------------------------------------------------------------------------------------------------------------------------------------------------------------------------------------------------------------------------------------|----------------------------------------------------------------------------------------------------------------------------------------|---------------------------------------------------------------------------------------------------------------------------|
| F290               | Government actions    | My state government should prioritize the economy over trying to reduce the spread of COVID-19.                                                                                                                                                                                                                                                                                                           | 5 = Strongly agree<br>4 = Agree<br>3 = Not sure<br>2 = Disagree<br>1 = Strongly disagree<br>X BLANK                                    |                                                                                                                           |
| <b>Vaccination</b> |                       |                                                                                                                                                                                                                                                                                                                                                                                                           |                                                                                                                                        |                                                                                                                           |
| <b>Item #</b>      | <b>Construct</b>      | <b>Item</b>                                                                                                                                                                                                                                                                                                                                                                                               | <b>Response Scale</b>                                                                                                                  | <b>Notes</b>                                                                                                              |
| G100               | Vaccine acceptability | <p>Scientists are currently working on a vaccine that could prevent people from getting infected with COVID-19. It is hoped that the vaccine will become available in about a year.</p> <p>For the next few questions, imagine that a COVID-19 vaccine becomes available in the next year.</p> <p>How willing would you be to get the COVID-19 vaccine if it was free or covered by health insurance?</p> | 5 = Definitely willing<br>4 = Probably willing<br>3 = Not sure<br>2 = Probably not willing<br>1 = Definitely not willing<br>X BLANK    | <b>[Note to programmers: Rotate response options 1-5 half of the time and 5-1 half of the time]</b>                       |
| G110               | Vaccine acceptability | What is the most you would pay out of pocket to get the COVID-19 vaccine? This would be from your own money, not paid for by health insurance.                                                                                                                                                                                                                                                            | 1 = \$0<br>2 = \$1-19<br>3 = \$20-49<br>4 = \$50-99<br>5 = \$100-199<br>6 = \$200-299<br>7 = \$300-399<br>8 = \$400 or more<br>X BLANK |                                                                                                                           |
| G120               | Cue to action         | <p>Please continue to imagine that the COVID-19 vaccine will become available in the next year.</p> <p>Do you think your doctor or other health care provider would recommend that you get the COVID-19 vaccine?</p>                                                                                                                                                                                      | 1=Yes<br>2=No<br>X BLANK                                                                                                               |                                                                                                                           |
| G130               | Perceived barriers    | If I decided to get the COVID-19 vaccine, it would be hard to find a provider or clinic that could give me the vaccine.                                                                                                                                                                                                                                                                                   | 5 = Strongly agree<br>4 = Agree<br>3 = Not sure<br>2 = Disagree<br>1 = Strongly disagree<br>X BLANK                                    | <b>[Note to programmers: Rotate response options 1-5 half of the time and 5-1 half of the time]</b>                       |
| G140               | Perceived barriers    | The COVID-19 vaccine might have side effects, like fever or soreness in the arm.                                                                                                                                                                                                                                                                                                                          | 5 = Strongly agree<br>4 = Agree<br>3 = Not sure<br>2 = Disagree<br>1 = Strongly disagree<br>X BLANK                                    | <b>[Note to programmers: Rotate response options 1-5 half of the time and 5-1 half of the time in same order as G130]</b> |

|      |                   |                                                                                                                                                                                                                                                                                                                                                              |                                                                                                                                                                                                                                                                                                                                                                                                                                                                                                                                                                                                    |                                                                                                                                                                                                               |
|------|-------------------|--------------------------------------------------------------------------------------------------------------------------------------------------------------------------------------------------------------------------------------------------------------------------------------------------------------------------------------------------------------|----------------------------------------------------------------------------------------------------------------------------------------------------------------------------------------------------------------------------------------------------------------------------------------------------------------------------------------------------------------------------------------------------------------------------------------------------------------------------------------------------------------------------------------------------------------------------------------------------|---------------------------------------------------------------------------------------------------------------------------------------------------------------------------------------------------------------|
| G150 | Response efficacy | In your opinion, how much would the COVID-19 vaccine protect you against getting COVID-19?                                                                                                                                                                                                                                                                   | 1 = Not at all<br>2 = A little<br>3 = A moderate amount<br>4 = A lot<br>X BLANK                                                                                                                                                                                                                                                                                                                                                                                                                                                                                                                    |                                                                                                                                                                                                               |
| G160 | Vaccination       | Imagine you are considering whether or not to get the COVID-19 vaccine.<br><br>Which of the following factors would matter to you in deciding whether or not to get the COVID-19 vaccine? Move each item into the appropriate box.                                                                                                                           | 1 = My age<br>2 = My race/ethnicity<br>3 = My health history (e.g., existing medical conditions)<br>4 = If I had recently travelled outside of the United States or was planning to do so<br>5 = If my health insurance covers the vaccine<br>6 = If a doctor recommends that I get the vaccine<br>7 = How well the vaccine works<br>8 = How long the vaccine's protection lasts<br>9 = Potential side effects of the vaccine (e.g., fever and soreness in the arm)<br>10 = The opinions of my family members and friends<br>11 = The number of people still getting sick with COVID-19<br>X BLANK | <b>[Note to programmers: Each factor shows up one at a time and then participants drag each factor into one of two "boxes". Box 1 is "factor would matter" and Box 2 is "factor would <u>not</u> matter"]</b> |
| G170 | Vaccination       | The COVID-19 vaccine would help protect the health of people who get vaccinated.<br><br>How important is it to you that getting the COVID-19 vaccine would protect your health?                                                                                                                                                                              | 5 = Extremely important<br>4 = Very important<br>3 = Fairly important<br>2 = Slightly important<br>1 = Not at all important<br>X BLANK                                                                                                                                                                                                                                                                                                                                                                                                                                                             | <b>[Note to programmers: Randomize Items G170 – G190]</b><br><br><b>[Note to programmers: Rotate response options 1-5 half of the time and 5-1 half of the time using same order for G170-G190]</b>           |
| G180 | Vaccination       | People who get the COVID-19 vaccine would be helping protect the health of their family members and friends. This is because vaccinated people cannot get COVID-19 and then pass it on to their family members and friends.<br><br>How important is it to you that getting the COVID-19 vaccine would protect the health of your family members and friends? | 5 = Extremely important<br>4 = Very important<br>3 = Fairly important<br>2 = Slightly important<br>1 = Not at all important<br>X BLANK                                                                                                                                                                                                                                                                                                                                                                                                                                                             | <b>[Note to programmers: Randomize Items G170 – G190]</b><br><br><b>[Note to programmers: Rotate response options 1-5 half of the time and 5-1 half of the time using same order for G170-G190]</b>           |



|      |                 |                                                                                                                                                                                                                                                                                                                                                                                                                                                                                                                                                                                                                                                                                                                                                     |                                                                                                                                                                                                                                                                                                                                                                                                       |                                                                                                                                                                                                            |
|------|-----------------|-----------------------------------------------------------------------------------------------------------------------------------------------------------------------------------------------------------------------------------------------------------------------------------------------------------------------------------------------------------------------------------------------------------------------------------------------------------------------------------------------------------------------------------------------------------------------------------------------------------------------------------------------------------------------------------------------------------------------------------------------------|-------------------------------------------------------------------------------------------------------------------------------------------------------------------------------------------------------------------------------------------------------------------------------------------------------------------------------------------------------------------------------------------------------|------------------------------------------------------------------------------------------------------------------------------------------------------------------------------------------------------------|
| G190 | Vaccination     | <p>If most people would get the COVID-19 vaccine, it would help protect the health of our communities by preventing the spread of COVID-19 in communities.</p> <p>How important is it to you that getting the COVID-19 vaccine would protect the health of your community?</p>                                                                                                                                                                                                                                                                                                                                                                                                                                                                      | <p>5 = Extremely important<br/> 4 = Very important<br/> 3 = Fairly important<br/> 2 = Slightly important<br/> 1 = Not at all important<br/> X BLANK</p>                                                                                                                                                                                                                                               | <p><b>[Note to programmers: Randomize Items G170 – G190]</b></p> <p><b>[Note to programmers: Rotate response options 1-5 half of the time and 5-1 half of the time using same order for G170-G190]</b></p> |
| G200 | Clinical trials | <p>As part of making a COVID-19 vaccine, scientists will need volunteers for research studies that see if the vaccine works and is safe. These studies are called "clinical trials." Clinical trials are required before a vaccine can be given to the general public. Volunteers for clinical trials are usually healthy people from our communities.</p> <p>How willing would you be to volunteer for a clinical trial for a COVID-19 vaccine?</p> <p>This means you would get 1 or 2 shots of the vaccine free of charge. You would then get monthly check-ups at a health clinic to see if the vaccine is working (usually done through a blood test). These check-ups would go on for several months, and the vaccine may or may not work.</p> | <p>5 = Definitely willing<br/> 4 = Probably willing<br/> 3 = Not sure<br/> 2 = Probably not willing<br/> 1 = Definitely not willing<br/> X BLANK</p>                                                                                                                                                                                                                                                  | <p><b>[Note to programmers: Rotate response options 1-5 half of the time and 5-1 half of the time]</b></p>                                                                                                 |
| G210 | Clinical trials | <p>What concerns would you have about volunteering for a clinical trial for a COVID-19 vaccine? Please select all that apply.</p>                                                                                                                                                                                                                                                                                                                                                                                                                                                                                                                                                                                                                   | <p>1 = The vaccine might not be safe<br/> 2 = The vaccine might not work<br/> 3 = Vaccines in general are bad for you<br/> 4 = I have health problems and may not be able to volunteer<br/> 5 = I don't trust scientists<br/> 6 = People might find out that I am in the clinical trial<br/> 7 = Something else, please tell us: _____ <b>[open ended, Item #G220]</b><br/> 8 = None<br/> X BLANK</p> | <p><b>[Note to programmers: Randomize response options 1 through 6]</b></p> <p><b>[Note to programmers: If response option #8 is selected, do not allow other answers to be selected]</b></p>              |
| G220 | Clinical trials | Other concern description                                                                                                                                                                                                                                                                                                                                                                                                                                                                                                                                                                                                                                                                                                                           | open-ended                                                                                                                                                                                                                                                                                                                                                                                            |                                                                                                                                                                                                            |

| <b>Additional Demographics</b> |                  |                                                                                                     |                                                                                                                                                                                                                                                                                                                                     |                                                                                                     |
|--------------------------------|------------------|-----------------------------------------------------------------------------------------------------|-------------------------------------------------------------------------------------------------------------------------------------------------------------------------------------------------------------------------------------------------------------------------------------------------------------------------------------|-----------------------------------------------------------------------------------------------------|
| <u>Item #</u>                  | <u>Construct</u> | <u>Item</u>                                                                                         | <u>Response Scale</u>                                                                                                                                                                                                                                                                                                               | <u>Notes</u>                                                                                        |
| H100                           | Demographics     | The next few questions are about you and your health care.<br><br>What is your relationship status? | 1 = Never married<br>2 = Married or civil union<br>3 = Divorced<br>4 = Separated<br>5 = Widowed<br>6 = Living with partner<br>X BLANK                                                                                                                                                                                               |                                                                                                     |
| H110                           | Demographics     | What was the total combined income of your household in the past year?                              | 1 = Less than \$20,000<br>2 = \$20,000 to \$49,999<br>3 = \$50,000 to \$89,999<br>4 = \$90,000 to \$119,999<br>5 = \$120,000 or above<br>X BLANK                                                                                                                                                                                    |                                                                                                     |
| H120                           | Demographics     | In general, would you say your views in most political matters are...                               | 1 = Very conservative<br>2 = Somewhat conservative<br>3 = Moderate<br>4 = Somewhat liberal<br>5 = Very liberal<br>X BLANK                                                                                                                                                                                                           | <b>[Note to programmers: Rotate response options 1-5 half of the time and 5-1 half of the time]</b> |
| H130                           | Demographics     | How important is religion to you?                                                                   | 1 = Not at all important<br>2 = Slightly important<br>3 = Fairly important<br>4 = Very important<br>5 = Extremely important<br>X BLANK                                                                                                                                                                                              | <b>[Note to programmers: Rotate response options 1-5 half of the time and 5-1 half of the time]</b> |
| H140                           | Demographics     | Which of the following best represents how you think of yourself?                                   | 1 = Straight<br>2 = Gay or lesbian<br>3 = Bisexual<br>4 = Queer<br>5 = Not sure<br>X BLANK                                                                                                                                                                                                                                          |                                                                                                     |
| H150                           | Travel           | Have you travelled outside the United States since January 1, 2020?                                 | 1 = Yes<br>2 = No<br>X = BLANK                                                                                                                                                                                                                                                                                                      |                                                                                                     |
| H160                           | Insurance        | Which of the following best describes your current health insurance situation?                      | 1 = I have no health insurance<br>2 = I have insurance through work<br>3 = I am covered by my spouse's or other family member's insurance<br>4 = I have insurance through school<br>5 = I buy private insurance myself<br>6 = I am covered through governmental insurance (e.g., Medicaid, Medicare)<br>8 = I don't know<br>X BLANK |                                                                                                     |

|                                 |                          |                                                                                                                                                                                                                                                            |                                                                                                                                                                                                                                                                                                                                                                               |                                                                                                             |
|---------------------------------|--------------------------|------------------------------------------------------------------------------------------------------------------------------------------------------------------------------------------------------------------------------------------------------------|-------------------------------------------------------------------------------------------------------------------------------------------------------------------------------------------------------------------------------------------------------------------------------------------------------------------------------------------------------------------------------|-------------------------------------------------------------------------------------------------------------|
| H170                            | Height                   | How tall are you without shoes?                                                                                                                                                                                                                            | ____ feet<br>____ inches<br>X = BLANK                                                                                                                                                                                                                                                                                                                                         |                                                                                                             |
| H180                            | Weight                   | How much do you weigh without shoes?                                                                                                                                                                                                                       | ____ pounds<br>X = BLANK                                                                                                                                                                                                                                                                                                                                                      |                                                                                                             |
| H190                            | Underlying conditions    | Have you ever been told by a doctor or other health care provider that you have any of these health conditions? Please select all that apply.                                                                                                              | 1 = Diabetes<br>2 = Hypertension (high blood pressure)<br>3 = Asthma<br>4 = Serious heart conditions<br>5 = Chronic lung disease<br>6 = Chronic kidney disease<br>7 = Liver disease<br>8 = Weakened immune system (immunocompromised)<br>9 = None of these<br>X BLANK                                                                                                         | <b>[Note to programmers: If response option #9 is selected, do not allow other answers to be selected]</b>  |
| <b>Intervention Preferences</b> |                          |                                                                                                                                                                                                                                                            |                                                                                                                                                                                                                                                                                                                                                                               |                                                                                                             |
| <b>Item #</b>                   | <b>Construct</b>         | <b>Item</b>                                                                                                                                                                                                                                                | <b>Response Scale</b>                                                                                                                                                                                                                                                                                                                                                         | <b>Notes</b>                                                                                                |
| H210                            | Intervention Preferences | We are interested in your opinions about how to best educate people about COVID-19. The last few questions ask for your opinions on this topic.<br><br>How would people your age want to receive information about COVID-19? Please select all that apply. | 1 = Website<br>2 = Smartphone app<br>3 = Email<br>4 = Text messages<br>5 = Telephone call with a health educator<br>6 = DVD sent through the mail<br>7 = Brochure sent through the mail<br>8 = In-person with a health educator<br>9 = Video chat (e.g., Zoom or Skype) with a health educator<br>10 = Some other way, please tell us: _____<br>11 = None of these<br>X BLANK | <b>[Note to programmers: If response option #11 is selected, do not allow other answers to be selected]</b> |
| H220                            | Intervention Preferences | What information would be important to include about COVID-19? Check all that apply.                                                                                                                                                                       | 1 = What it is<br>2 = How common it is<br>3 = Its symptoms and outcomes<br>4 = How it is passed from person to person<br>5 = How to reduce the chances of getting it<br>6 = How to get tested<br>7 = Treatment options for people who get it<br>8 = How to take care of someone with it<br>9 = Something else, please tell us: _____<br>X BLANK                               |                                                                                                             |

|                   |                          |                                                                                                                                                                                              |                                                                                                                                                                                                                                                  |
|-------------------|--------------------------|----------------------------------------------------------------------------------------------------------------------------------------------------------------------------------------------|--------------------------------------------------------------------------------------------------------------------------------------------------------------------------------------------------------------------------------------------------|
| H230              | Intervention Preferences | There are a lot of ways to present information about health. What would be a good way to present information about COVID-19? Please select all that apply.                                   | 1 = In a fact sheet<br>2 = Through a question and answer format<br>3 = By having people share their experiences with COVID-19<br>4 = An interactive program that would help people learn<br>5 = Some other way, please tell us: _____<br>X BLANK |
| H240              | Intervention Preferences | Some health materials show pictures or videos of people along with the information.<br><br>Which types of people would be good to include in materials about COVID-19? Check all that apply. | 1 = Doctor<br>2 = Nurse<br>3 = Scientist<br>4 = People from the community<br>5 = Someone who has had COVID-19<br>6 = A caregiver of someone who had COVID-19<br>X BLANK                                                                          |
| Closing Statement |                          | That completes the survey. Thank you for your valuable time!                                                                                                                                 |                                                                                                                                                                                                                                                  |

## References

Items from the following sources were used or modified for use in our survey:

Center for Drug Use and HIV/HCV Research. COVID-19 interview for vulnerable populations. 2020. Available at: <https://clelandcm.github.io/COVID19-Interview-Items/COVID-Items.html>

Harkness A, Behar-Zusman V, Safren SA. Understanding the impact of COVID-19 on Latino sexual minority men in a US HIV hot spot. *AIDS Behav.* 2020;24:2017-2023.

Kachanoff FJ, Bigman YE, Kapsaskis K, Gray K. Measuring realistic and symbolic threats of COVID-19 and their unique impacts on well-being and adherence to public health behaviors. *Soc Psychol Pers Sci.* (In press).

McRee AL, Brewer NT, Reiter PL, Gottlieb SL, Smith JS. The Carolina HPV Immunization Attitudes and Beliefs scale (CHIAS): Scale development and associations with intentions to vaccinate. *Sex Transm Dis.* 2010;37(4):234-239.

Pew Research Center. 2020 Pew Research Center's American Trends Panel: Wave 63.5 coronavirus survey. 2020. Available at: [https://www.journalism.org/wp-content/uploads/sites/8/2020/03/PJ\\_2020.03.18\\_Coronavirus-News1\\_TOPLINE.pdf](https://www.journalism.org/wp-content/uploads/sites/8/2020/03/PJ_2020.03.18_Coronavirus-News1_TOPLINE.pdf)

Reiter PL, McRee AL, Gottlieb SL, Markowitz LE, Brewer NT. Uptake of 2009 H1N1 vaccine among adolescent females. *Hum Vaccin.* 2011;7(2):191-196.

Reiter PL, McRee AL, Gottlieb SL, Brewer NT. Correlates of receiving recommended adolescent vaccines among adolescent females in North Carolina. *Hum Vaccin.* 2011;7(1):67-73.

Reiter PL, McRee AL, Pepper JK, Gilkey MB, Galbraith KV, Brewer NT. Longitudinal predictors of human papillomavirus vaccination among a national sample of adolescent males. *Am J Public Health.* 2013;103(8):1419-1427.

Reiter PL, McRee AL, Katz ML, Paskett ED. Human papillomavirus vaccination among young adult gay and bisexual men in the United States. *Am J Public Health.* 2015;105(1):96-102.

RTI International. RTI COVID-1 U.S. survey methodology. 2020. Available at: <https://www.rti.org/sites/default/files/related-content-files/covid-19-us-survey-methodology.pdf>

Waller J, Marlow LA, Wardle J. The association between knowledge of HPV and feelings of stigma, shame and anxiety. *Sex Transm Infect.* 2007;83(2):155-159.

World Health Organization Regional Office for Europe. Rapid, simple, flexible behavioural insights on COVID-19. Survey tool and guidance. 2020. Available at: [https://www.euro.who.int/\\_data/assets/pdf\\_file/0007/436705/COVID-19-survey-tool-and-guidance.pdf](https://www.euro.who.int/_data/assets/pdf_file/0007/436705/COVID-19-survey-tool-and-guidance.pdf)
